# Supplementary material for: Effect of co-administration of CoQ10-loaded nanoparticles on the efficacy and cardiotoxicity of doxorubicin-loaded nanoparticles
Source: Royal Society of Chemistry journal article supplement (doi:10.1039/c3ra41107a), 2013-01-01
Supplement: c3ra41107a.pdf [file c3ra41107a.pdf]

**Supplementary information:**

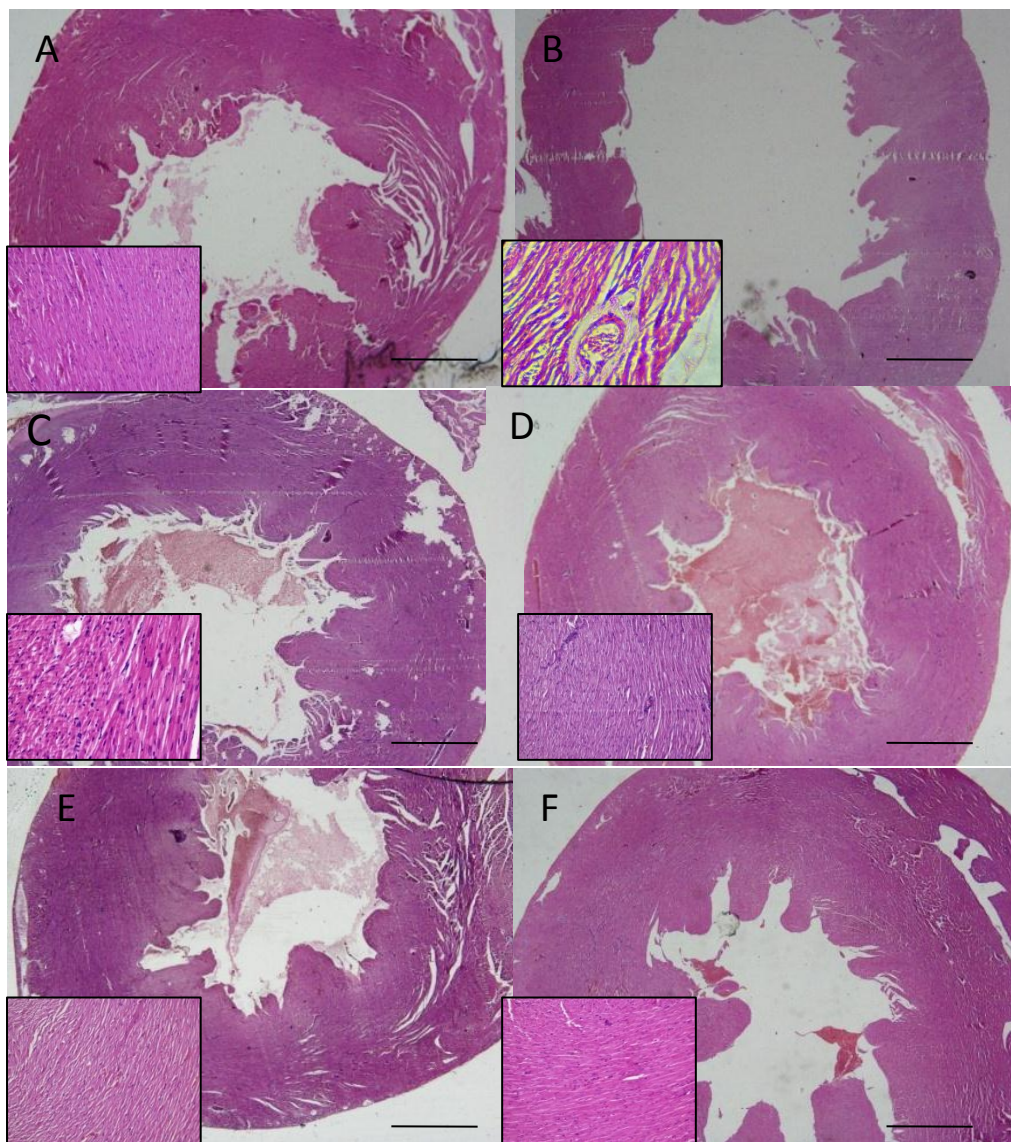

**Figure S1:** Histopathological examination of whole heart after treatment with different formulations (A) Control, (B) Dox *i.v.*, (C) Lipodox *i.v.*, (D) Dox-NPs (E) Dox-NPs + free CoQ10 and (F) Dox-NPs + CoQ10 NPs (original magnification X 50). The inset image in each section represents histopathological changes at the tissue level after treatment with the same formulations (original magnification X 500).

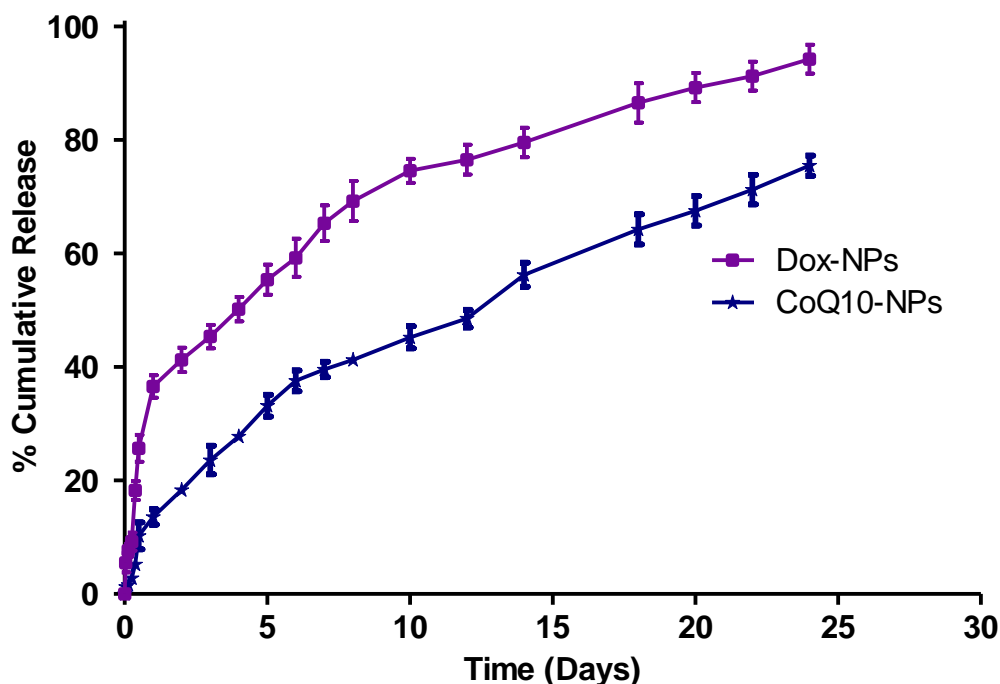

Figure S2. *In vitro* release profile of Dox and CoQ10 from their NPs.

In the release study, dissolution medium PBS (pH 7.4) and 5 % w/w Cremophor EL PBS solution (pH 7.4) was used for Dox-NPs and CoQ10-NPs formulation, respectively.

Data point are expressed as mean $\pm$ SD (n=6)

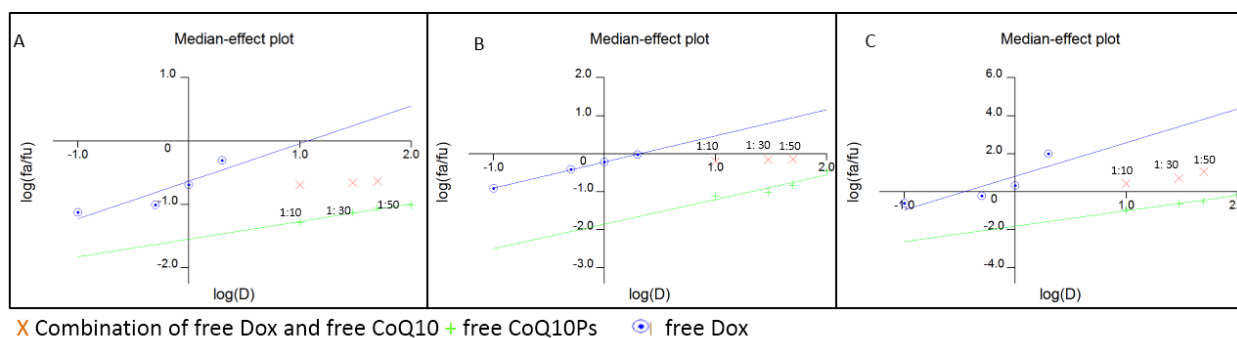

**Figure S3:** Median-effect plots for free CoQ10, free Dox and their combination upon incubating with MCF-7 cell lines at different concentrations for 24 h (A), 48 h (B), 72 h (C). Values of 1:10, 1:30 and 1:50 represents weight ratio of Dox and CoQ10, respectively when used in combination.

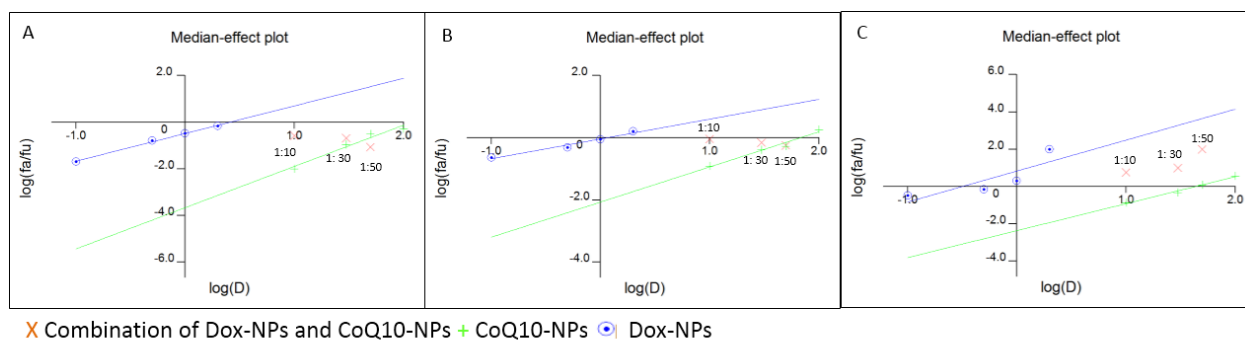

**Figure S4:** Median-effect plots for CoQ10 NPs, Dox-NPs and their combination upon incubating with MCF-7 cell lines at different concentrations for 24 h (A), 48 h (B), 72 h (C). Values of 1:10, 1:30 and 1:50 represents weight ratio of Dox and CoQ10, respectively when used in combination.
